# Supplementary material for: Antimicrobial and Hepatoprotective Properties of Pods of Acacia nilotica (L.) Willd. ex Delile: In Vivo and In Silico Approaches
Source: PubMed Central journal article supplement — Dose Response. 2024 Dec 12;22(4):15593258241308998. doi: 10.1177/15593258241308998 (PMC11639031; doi:10.1177/15593258241308998), 2024-12-12
Supplement: sj-pdf-1-dos-10.1177_15593258241308998.pdf [file sj-pdf-1-dos-10.1177_15593258241308998.pdf]

**Pharmacognostic assessment of pods of *Acacia nilotica* (L.) Willd. ex Delile with *in vitro* anti-microbial and *in-vivo* hepatoprotective potential of its n-hexane and methanol extracts**

**Supplementary Docking Data**

| Table of Contents                                                                                                                                                                        | Pg# |
|------------------------------------------------------------------------------------------------------------------------------------------------------------------------------------------|-----|
| Table S1: Molecular docking data of ligands (constituents) isolated from <i>A. nilotica</i> methanolic extract, showing antibacterial activity with the target protein (PDB ID: 3WD1)    | 2   |
| Table S2: Molecular docking data of ligands (constituents) isolated from <i>A. nilotica</i> methanolic extract, showing hepatoprotective activity with the target protein (PDB ID: 5HYK) | 3   |

**Table S1: Molecular docking data of ligands (constituents) isolated from *A. nilotica* methanolic extract, showing antibacterial activity with the target protein (PDB ID: 3WD1)**

| Ligand                                            | docking score (kcal/mol) | glide gscore (kcal/mol) | glide emodel (kcal/mol) |
|---------------------------------------------------|--------------------------|-------------------------|-------------------------|
| co-crystallized ligand (Antibacterial-3WD1)       | -10.030                  | -12.233                 | -156.222                |
| ciprofloxacin 2764                                | -6.299                   | -6.399                  | -56.826                 |
| Ergost-5-en-3-ol 18660356                         | -6.223                   | -6.223                  | -46.164                 |
| Pyrogallol 1057                                   | -5.955                   | -5.960                  | -35.451                 |
| 4-O methylmannose 345716                          | -5.525                   | -5.525                  | -44.395                 |
| Ergosta-5,22-dien-3-ol, (3-beta.22E)- 5281327     | -5.496                   | -5.496                  | -42.928                 |
| Phthalic acid, bis(2-ethylhexyl) ester 8343       | -5.478                   | -5.478                  | -54.307                 |
| 4-methylbenzenethiol 7811                         | -5.043                   | -5.225                  | -20.796                 |
| N,N-Dimethylglycine 673                           | -4.973                   | -4.973                  | -32.677                 |
| Oxiranyl methyl ester 9-octadecenoic acid 5354568 | -4.670                   | -4.670                  | -47.787                 |
| Glycedyl palmitate (Methyl ricinoleate) 5354133   | -3.955                   | -3.955                  | -54.034                 |
| 15-Hydroxypentadecanoic Acid 78360                | -1.583                   | -1.586                  | -33.770                 |
| Methyl 9-cis,11-trans-octadecadienoate 11748436   | -0.830                   | -0.830                  | -37.037                 |
| Methyl oleate 5364509                             | -0.829                   | -0.829                  | -35.966                 |
| Methyl linoleate 5284421                          | -0.761                   | -0.761                  | -40.585                 |
| 14,17-Octadecadienoic acid, methyl ester 5365751  | -0.752                   | -0.752                  | -38.355                 |
| 9-Octadecenamide 1930                             | -0.601                   | -0.601                  | -36.789                 |
| hexadecanoic acid, methyl ester 8181              | -0.068                   | -0.068                  | -33.277                 |
| 9,12-Octadecadienoic acid (Z,Z)- 5280450          | -0.039                   | -0.043                  | -27.857                 |
| 1,8,11-Heptadecatriene, (Z,Z)- 5352709            | 0.119                    | 0.119                   | -27.641                 |

|                         |       |       |         |
|-------------------------|-------|-------|---------|
| Methyl stearate<br>8201 | 0.273 | 0.273 | -33.279 |
|-------------------------|-------|-------|---------|

**Table S2: Molecular docking data of ligands (constituents) isolated from *A. nilotica* methanolic extract, showing hepatoprotective activity with the target protein (PDB ID: 5HYK)**

| Ligand                                                | docking score<br>(kcal/mol) | glide gscore<br>(kcal/mol) | glide emodel<br>(kcal/mol) |
|-------------------------------------------------------|-----------------------------|----------------------------|----------------------------|
| co-crystallized ligand<br>(Hepatoprotective-5HYK)     | -9.023                      | -9.023                     | -59.095                    |
| Oxiranyl methyl ester 9-octadecenoic acid<br>5354568  | -6.882                      | -6.882                     | -51.783                    |
| Glycedyl palmitate<br>(Methyl ricinoleate)<br>5354133 | -6.874                      | -6.874                     | -46.628                    |
| Phthalic acid, bis(2-ethylhexyl) ester<br>8343        | -6.108                      | -6.108                     | -20.247                    |
| 4-O methylmannose<br>345716                           | -6.069                      | -6.069                     | -37.856                    |
| N,N-Dimethylglycine<br>673                            | -5.926                      | -5.926                     | -31.603                    |
| 4-methylbenzenethiol<br>7811                          | -5.842                      | -6.632                     | -32.340                    |
| Pyrogallol<br>1057                                    | -5.685                      | -5.690                     | -30.454                    |
| 9,12-Octadecadienoic acid (Z,Z)-<br>5280450           | -3.806                      | -3.810                     | -49.930                    |
| 9-Octadecenamide<br>1930                              | -3.784                      | -3.784                     | -51.397                    |
| 15-Hydroxypentadecanoic<br>Acid<br>78360              | -3.647                      | -3.651                     | -56.487                    |
| Methyl linoleate<br>5284421                           | -3.422                      | -3.422                     | -44.004                    |
| Silymarin<br>5213                                     | -3.097                      | -5.682                     | -42.161                    |
| Methyl 9-cis,11-trans- octadecadienoate<br>11748436   | -2.444                      | -2.444                     | -35.475                    |
| Methyl stearate<br>8201                               | -2.432                      | -2.432                     | -40.650                    |
| Methyl oleate<br>5364509                              | -2.141                      | -2.141                     | -38.522                    |
| hexadecanoic acid, methyl ester<br>8181               | -1.937                      | -1.937                     | -38.283                    |
| 14,17-Octadecadienoic acid, methyl ester<br>5365751   | -1.937                      | -1.937                     | -34.827                    |
